# Supplementary material for: Insights into Bioactive Peptides in Cosmetics
Source: MDPI journal article supplement (doi:10.3390/cosmetics10040111), 2023-08-02
Supplement: s1 [file s1]

Archive with 1 entries (1 files):
- cosmetics-2516626-supplementary.pdf
