# Supplementary material for: Insights into Bioactive Peptides in Cosmetics
Source: MDPI journal article supplement (doi:10.3390/cosmetics10040111), 2023-08-02
Supplement: s1 [file s1 › cosmetics-2516626-supplementary.pdf]

## **Supporting Information**

### **Insights into Bioactive Peptides in Cosmetics**

Le Thi Nhu Ngoc<sup>1</sup>, Ju-Young Moon<sup>2,\*</sup>, Young-Chul Lee<sup>3,\*</sup>

<sup>1</sup>Department of Nano Science and Technology Convergence, Gachon University, 1342 Seongnam-Daero, Sujeong-gu, Seongnam-si 13120, Gyeonggi-do, Republic of Korea

<sup>2</sup>Department of Beauty Design Management, Han-sung University, 116 Samseongyoro-16gil, Seoul 02876, Republic of Korea

<sup>3</sup>Department of BioNano Technology, Gachon University, 1342 Seongnam-daero, Sujeong-gu, Seongnam-si, Gyeonggi-do 13120, Republic of Korea

\*Correspondences:

dreamdbbs@gachon.ac.kr (Y.-C. L.), Tel: +82-31-750-8751, Fax: +82-31-776-2864

bora7033@naver.com (J.-Y.M.); Tel: +82-31-776-2863; Fax: +82-31-776-2864

Table S1. Classification of cosmetic peptides

| Type of peptide | Site of action                           | Name of peptide              | Mechanism of action                                                                                      | Cosmetic functionality                                     |
|-----------------|------------------------------------------|------------------------------|----------------------------------------------------------------------------------------------------------|------------------------------------------------------------|
| Signal peptide  | Modulator of dermal extracellular matrix | Pal-KTTKS                    | Increases the synthesis of fibronectin and collagen type I/III, glycosaminoglycan and elastin production | Anti-wrinkle<br>Anti-aging                                 |
|                 |                                          | Pal-GHK or Pal tripeptide 1  | Provides a retionic acid-like activity<br>Stimulates the synthesis of collagen and glycosaminoglycan     | Anti-aging<br>Skin moisturizer<br>Firming agent            |
|                 | Collagen modulators                      | Trifluoroacetyl Tripeptide-2 | Stimulates extracellular matrix via inhibiting MMP-1, 3, 9<br>Acts as elastase inhibitors                | Anti-aging<br>Anti-wrinkle                                 |
|                 |                                          | Palmitoyl tripeptide-3/5     | Mimics thrombospondin 1 tripeptide sequence and collagen synthesis via TGF- $\beta$                      | Firming agent<br>Skin moisturizer<br>Improve stretch marks |
|                 |                                          | Tripeptide-10                | Promotes the formation of collagen fibers                                                                | Anti-aging<br>Firming agent                                |

|                    |                                        |                                                                                                                                                                                |                                                                |
|--------------------|----------------------------------------|--------------------------------------------------------------------------------------------------------------------------------------------------------------------------------|----------------------------------------------------------------|
|                    |                                        | Mimics the decorin sequences bound with collagen fibrils                                                                                                                       | Photoprotection                                                |
|                    | Peptamide-6 or phe-val-ala-pro-phe-pro | Mimics the action of TGF- $\beta$ which facilitates maturation of adipocyte precursor cells into contractile fibroblast<br><br>Prevents the differentiation of adipocytes      | Skin firming agent in treatment of cellulite<br><br>Anti-aging |
|                    | Oligopeptide Tyr-Tyr-Arg-Ala-asp-Ala   | Inhibits procollagen-C enzyme which converts procollagen to collagen                                                                                                           | Anti-wrinkle<br><br>Firming agent                              |
|                    | Acetyl tetrapeptide-9/11               | Stimulates the synthesis of syndecan, lumican, and collagen type I                                                                                                             | Anti-wrinkle<br><br>Firming agent<br><br>Anti-aging            |
|                    | Acetyl tetrapeptide-5                  | Reduces edema by inhibiting angiotensin-converting enzyme and collagen crosslinking<br><br>Inhibits glycation thereby preventing the abnormal cross-linking of collagen fibers | Dermatochalasis or baggy eye lids                              |
| Elastin modulators | Dipeptide-2/(valyl-tryptophane)        | Lymph drainage via ACE inhibition                                                                                                                                              | Baggy eyelids                                                  |

|                               |                                                           |                                                                              |                       |
|-------------------------------|-----------------------------------------------------------|------------------------------------------------------------------------------|-----------------------|
|                               | Hexapeptide Val-Gly-Val-Ala-Pro-Gly                       | Downregulates elastin                                                        | Firming agent         |
|                               |                                                           | Stimulates skin fibrous cells to form vessels and endothelial cell migration | Anti-wrinkle          |
|                               | Palmitoyl oligopeptide                                    | Increases collagen and hyaluronic acid                                       | Anti-aging            |
|                               |                                                           |                                                                              |                       |
| Keratinocytes/epidermal cells | Aquaporin                                                 | Increase the thickness of the stratum corneum                                | Skin moisturizer      |
|                               |                                                           |                                                                              | Anti-wrinkles         |
|                               |                                                           |                                                                              | Anti-aging            |
|                               | Growth factors                                            | Inhibits keratinocyte growth,                                                | Anti-wrinkles         |
|                               | Transforming growth factor (TGFs)                         | Chemotactic for macrophages and fibroblasts                                  | Post-skin resurfacing |
|                               | Hepatocyte growth factors (HGFs)                          | Promotes neovascularization Promotes cell growth and keratinocyte migration  | Photoaging            |
|                               | Keratinocyte growth factor and insulin-like growth factor |                                                                              |                       |
|                               |                                                           |                                                                              |                       |
|                               | Heat shock protein 70                                     | Prevents cells against apoptosis, aging, and UV damage                       | Anti-wrinkles         |
|                               |                                                           |                                                                              | Anti-aging            |

|                             |    |                                                |                                                                                   |                  |            |  |
|-----------------------------|----|------------------------------------------------|-----------------------------------------------------------------------------------|------------------|------------|--|
|                             |    |                                                | Inhibits aggregation and supports the regeneration of denatured proteins          |                  |            |  |
| Modulation of melanogenesis | of | Interferon alpha                               | Increases the concentration of dendritic cells and CD1a and HLA-DR positive cells | Anti-wrinkles    | Anti-aging |  |
|                             |    | Kinetin (natural plant derived growth hormone) | Inhibits the growth of keratinocytes                                              | Anti-wrinkles    |            |  |
|                             |    |                                                | Delays the onset of aging features in human fibroblasts                           | Anti-aging       |            |  |
|                             |    | Tetrapeptide (His-D-Phe-Arg-Trp)               | Analogue of $\alpha$ -MSH causes the synthesis of melanin                         | Cosmetic tanning | Vitiligo   |  |
|                             |    |                                                | Minimizes DNA damage by enhancing repair of DNA and scavenging ROS free radicals  |                  |            |  |
|                             |    | Tripeptide (His-D-Phe-Arg)                     | Analogue of $\alpha$ -MSH induces melanin synthesis                               | Cosmetic tanning | Vitiligo   |  |
|                             |    | Ser-Tyr-Ser-Nle-Glu-His-D-p-Phe-Arg-Trp-Gly-   | MC1R/ $\alpha$ -MSH signaling pathway                                             | Vitiligo         |            |  |
|                             |    |                                                | Induces melanin synthesis                                                         |                  |            |  |
|                             |    |                                                | Anti-inflammatory                                                                 |                  |            |  |

|                                                          |                                |                                                |                                           |                                                                    |
|----------------------------------------------------------|--------------------------------|------------------------------------------------|-------------------------------------------|--------------------------------------------------------------------|
| Lys-Pro-Val (Melano-Tan-1)                               |                                |                                                |                                           |                                                                    |
| Decapeptide                                              |                                | Derived from b-FGF, induces melanin synthesis  |                                           | Vitiligo                                                           |
| Acetyl hexapeptide-1                                     |                                | Melanin increases via $\alpha$ -MSH regulation |                                           | Vitiligo<br>Tanning<br>Hair repigmentation                         |
| Tyr-Arg-Ser-Arg-Lys-Tyr-Ser-Ser-Trp-Tyr (decapeptide-12) |                                | Tyrosinase inhibitor                           |                                           | Melasma, postinflammatory hyperpigmentation<br>Lentigo<br>Freckles |
| Nonapeptide-1                                            |                                | Tyrosinase activation inhibition               |                                           | Melasma, post-inflammatory hyperpigmentation                       |
| Carrier peptide                                          | Collagen and elastin synthesis | GHK-Cu glycyl-histidyl-lysine (tripeptide 1)   | Activates acute and chronic wound healing | Anti-aging<br>Skin laxity<br>Wrinkles                              |

|                                            |                                        |                                       |                                                                        |                                         |
|--------------------------------------------|----------------------------------------|---------------------------------------|------------------------------------------------------------------------|-----------------------------------------|
|                                            |                                        |                                       | Regenerates collagen by modulating levels of TIMP-1, TIMP-2, and MMP-2 | In sunscreens and post-skin resurfacing |
|                                            |                                        |                                       | Increases synthesis of dermatan sulfate and chondroitin sulfate        |                                         |
|                                            |                                        |                                       | Stimulates antioxidant responses                                       |                                         |
|                                            |                                        |                                       |                                                                        |                                         |
|                                            |                                        | Manganese tripeptide complex-1 GHK-Mn | Stimulates matrix protein growth, antioxidant reactions                | Wrinkles<br>Anti-aging                  |
|                                            |                                        | Acetyl hexapeptide 3/8                | Offers botox-like through inhibiting SNARE and releasing catecholamine | Firming and toning skin                 |
|                                            |                                        |                                       |                                                                        | Skin hydration                          |
|                                            |                                        |                                       |                                                                        | Periorbital wrinkle                     |
| Neurotransmitter<br>-inhibitor<br>peptides | Moisturizing effect                    | Pentapeptide 18                       | Inhibits nerve cell activity and catecholamine release                 | Firming and toning skin                 |
|                                            | Stimulating collagen/elastin synthesis |                                       |                                                                        | Skin hydration                          |
|                                            | Inhibiting melanin synthesis           |                                       |                                                                        | Periorbital wrinkle                     |
|                                            |                                        | Pentapeptide 3                        | Competitive antagonist at acetylcholine receptors                      | Anti-wrinkle<br>Anti-aging              |

|                   |                                        |                                                        |                                                                                                                                                         |                                              |
|-------------------|----------------------------------------|--------------------------------------------------------|---------------------------------------------------------------------------------------------------------------------------------------------------------|----------------------------------------------|
|                   |                                        | Dipeptide diaminobutyroyl benzylamide diacetate        | Mimics the effects of waglerin, a neurotoxin derived from the venom of <i>Tropidolaemus wagleri</i><br><br>Offers botox-like via acetylcholine receptor | Anti-wrinkle<br><br>Anti-aging               |
| Enzyme            | Moisturizing effect                    | Soybean amino acids                                    | Inhibits proteinase formation, increases                                                                                                                | Anti-aging                                   |
| inhibitor peptide | Stimulating collagen/elastin synthesis |                                                        | the length and number of hair roots                                                                                                                     | Skin moisturizer<br><br>Hair promoting agent |
|                   |                                        | Rice peptides                                          | Promotes the expression of hyaluronan synthase 2 genes                                                                                                  | Hair conditioning agent<br>Anti-aging        |
|                   |                                        | Silk proteins derived from silkworm <i>Bombyx mori</i> | Shows antioxidant activity<br><br>Offers high affinity to chelate with copper<br><br>Inhibits the activity of lipid peroxidation and tyrosinase         | Anti-aging                                   |
